# Supplementary material for: Statistical Approach to Decreasing the Error Rate of Noninvasive Prenatal Aneuploid Detection caused by Maternal Copy Number Variation
Source: PubMed Central journal article supplement (PMC4632076; doi:10.1038/srep16106), 2015-11-04
Supplement: srep16106-s1.pdf [file srep16106-s1.pdf]

**Statistical Approach on Decreasing Error Rate of Noninvasive Prenatal Aneuploid Detection caused by Maternal Copy Number Variation**

Han Zhang<sup>1+</sup>, Yang-Yu Zhao<sup>2+</sup>, Jing Song<sup>3+</sup>, Qi-Ying Zhu<sup>4+</sup>, Hua Yang<sup>5+</sup>, Mei-Ling Zheng<sup>6</sup>, Zhao-Ling Xuan<sup>1</sup>, Yuan Wei<sup>2</sup>, Yang Chen<sup>1</sup>, Peng-Bo Yuan<sup>2</sup>, Yang Yu<sup>2</sup>, Da-Wei Li<sup>1</sup>, Jun-Bin Liang<sup>1</sup>, Ling Fan<sup>3\*</sup>, Chong-Jian Chen<sup>1\*</sup>, Jie Qiao<sup>2\*</sup>

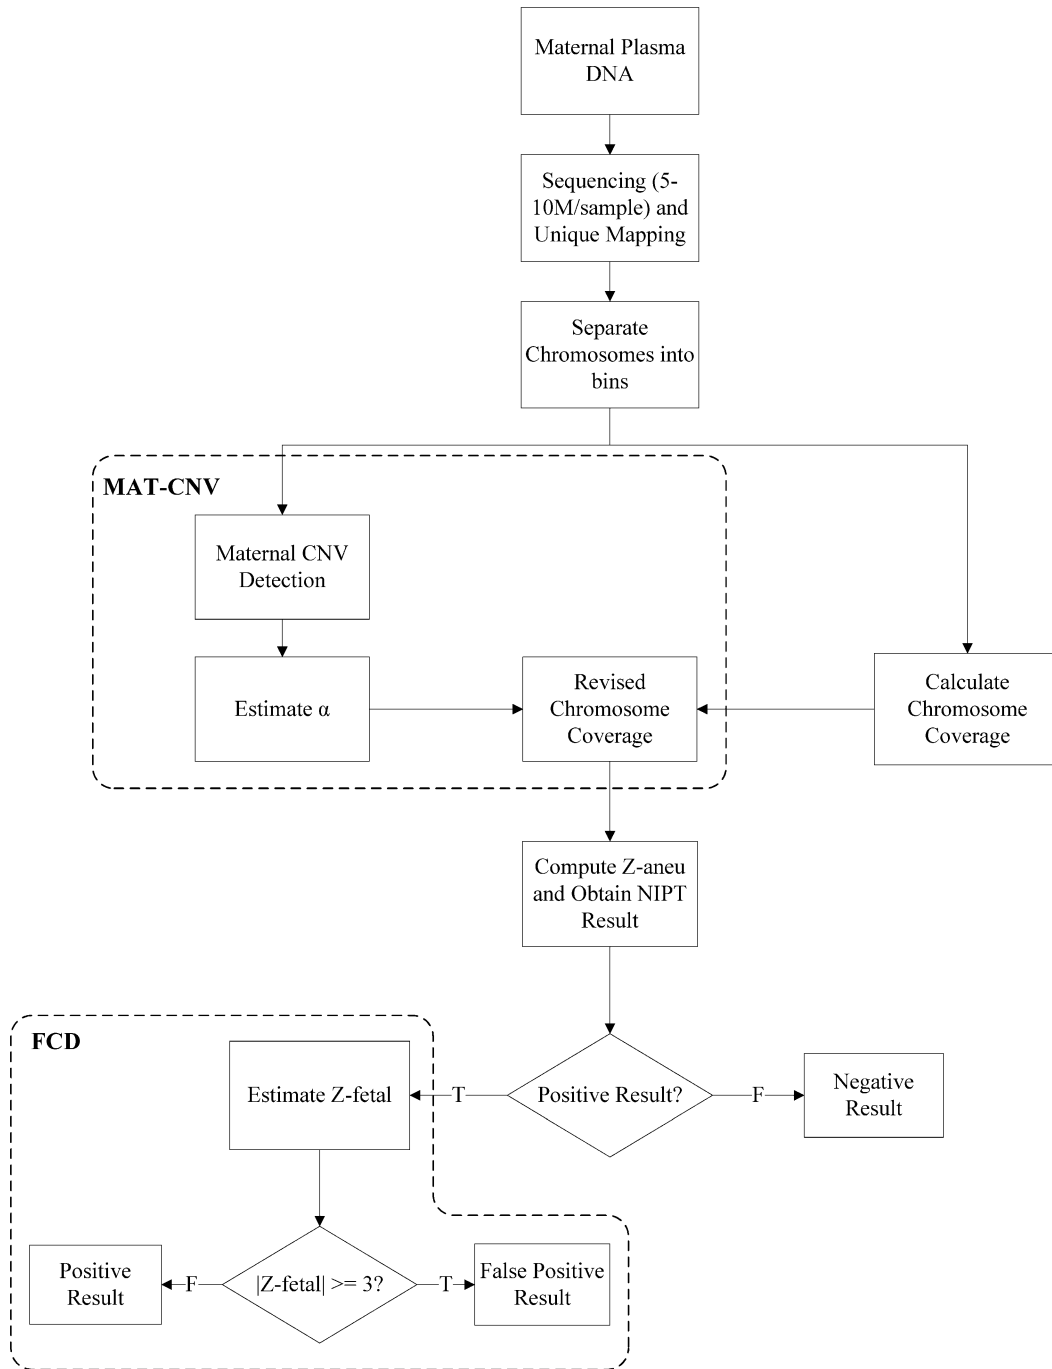

Supplementary Figure 1. The NIPT FCAD workflow.

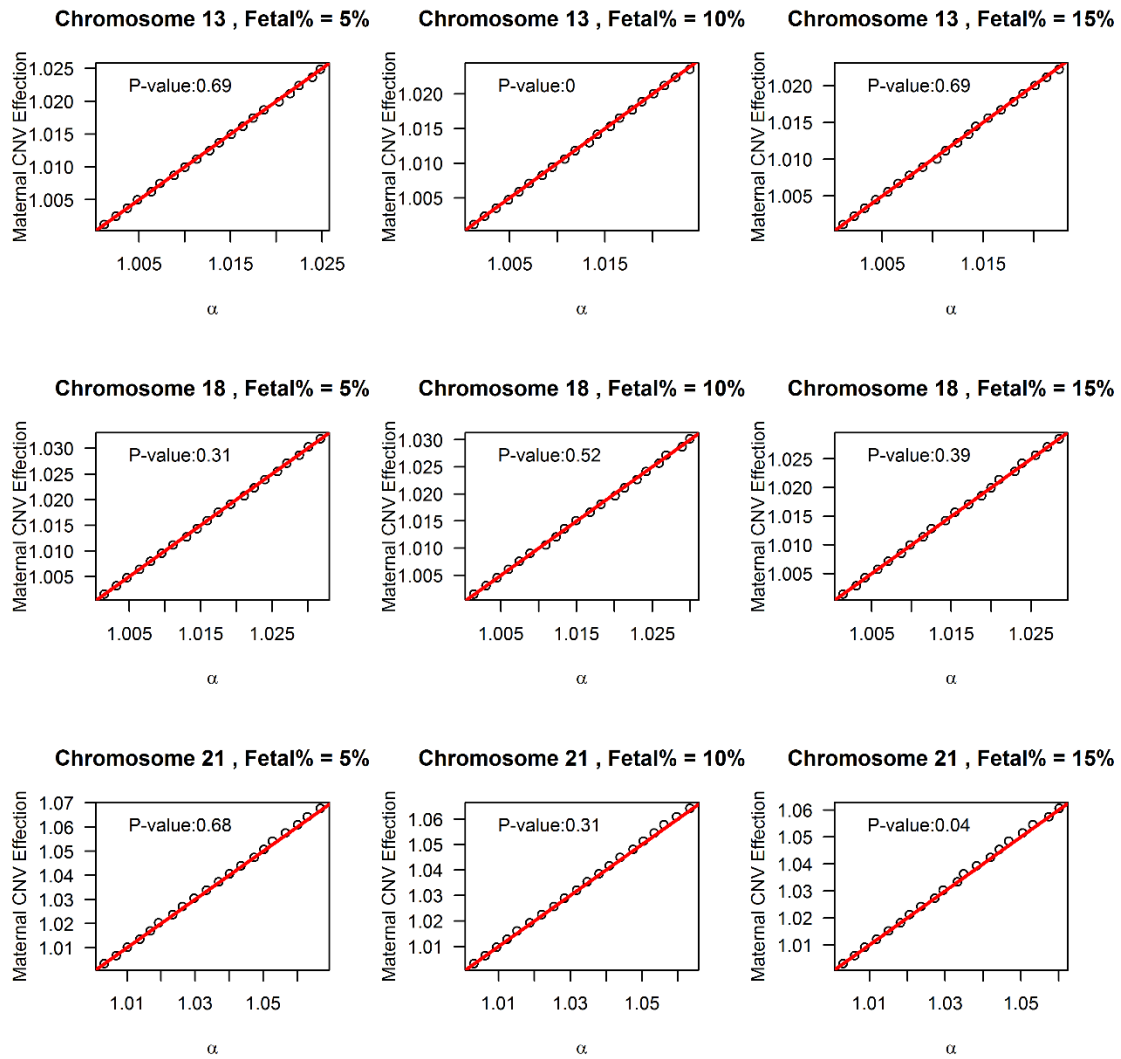

Supplementary Figure 2. Evaluation of the parameter  $\alpha$  in the presence of maternal duplication. The relationships between the parameter  $\alpha$  and the real maternal CNV effect are plotted for chromosomes 13, 18 and 21 in the case of fetal concentrations of 5%, 10% and 15%, respectively. Red lines represent the function  $y = x$ . The P-value in each plot was computed using the Shapiro–Wilk test.

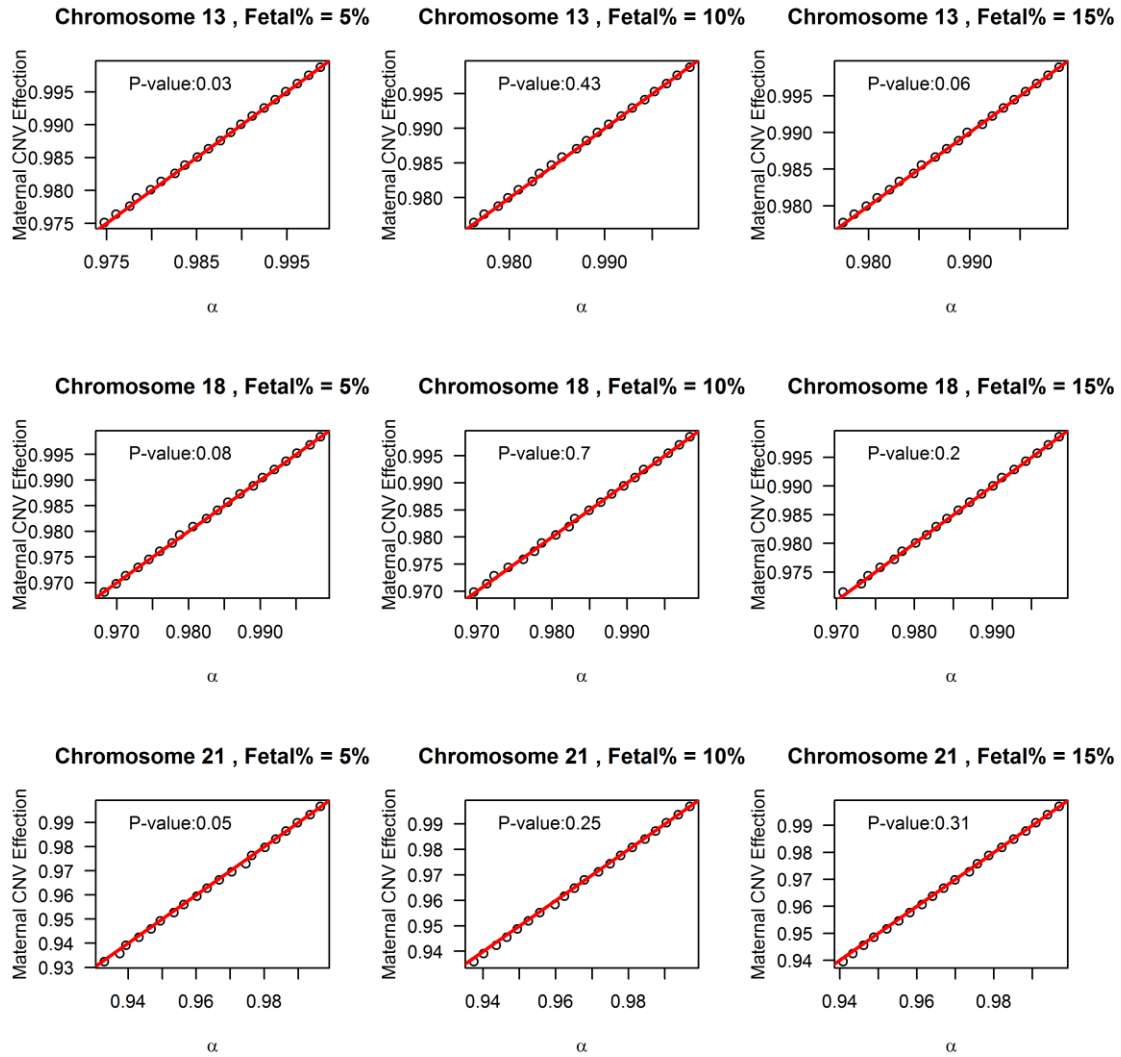

Supplementary Figure 3. Evaluation of the parameter  $\alpha$  in the presence of maternal deletion. The relationships between the parameter  $\alpha$  and the real maternal CNV effect are plotted for chromosomes 13, 18 and 21 in the case of fetal concentrations of 5%, 10% and 15%, respectively. Red lines represent the function  $y = x$ . The P-value in each plot was computed using the Shapiro–Wilk test.

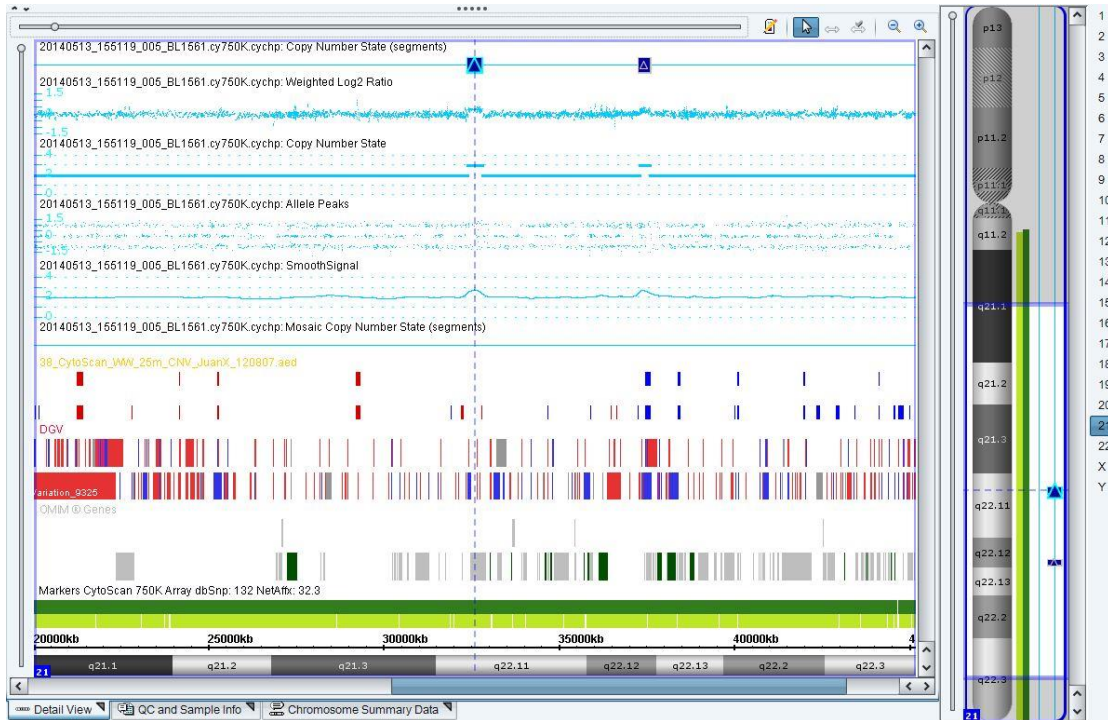

Supplementary Figure 4. Confirmation of maternal duplication in chromosome 21 in EK01875 using SNP-array.

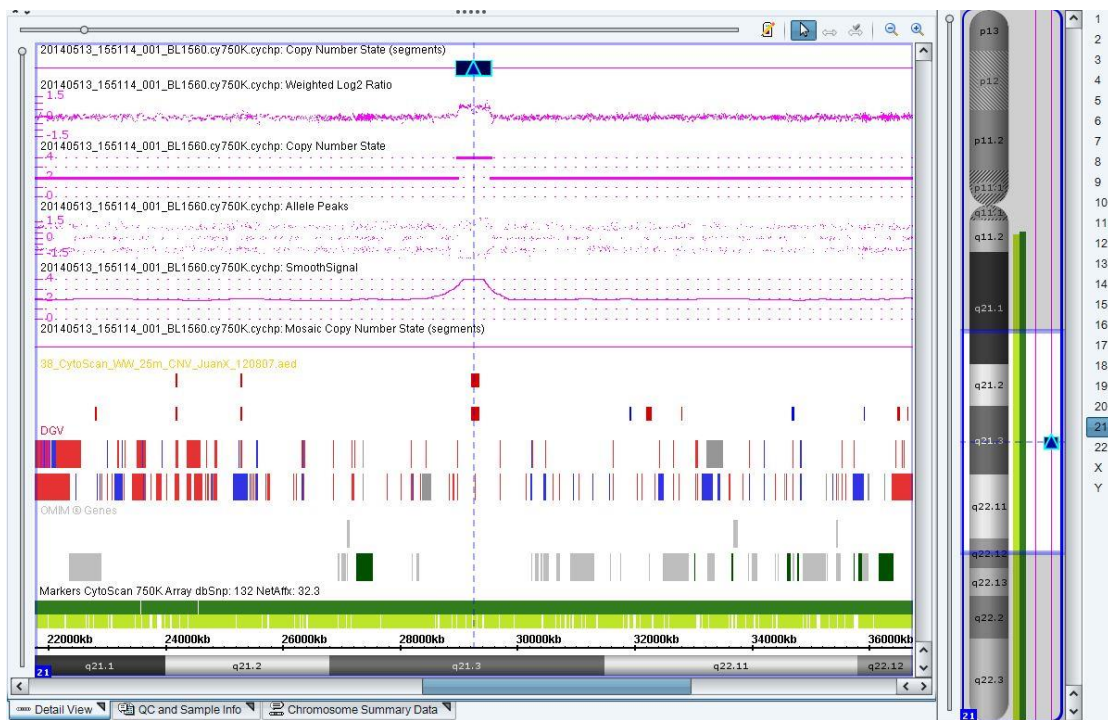

Supplementary Figure 5. Confirmation of maternal duplication in chromosome 21 in BD01462 using SNP-array.
